# Supplementary material for: A trial sequential meta-analysis ofTNF-α –308G&gt;A (rs800629) gene polymorphism and susceptibility to colorectal cancer
Source: Oxford University Press journal article supplement (doi:10.1042/bsr20181052), 2018-12-03
Supplement: bsr-2018-1052_supp.pdf [file bsr-2018-1052_supp.pdf]

**Funnel Plot of Standard Error by Log odds ratio**

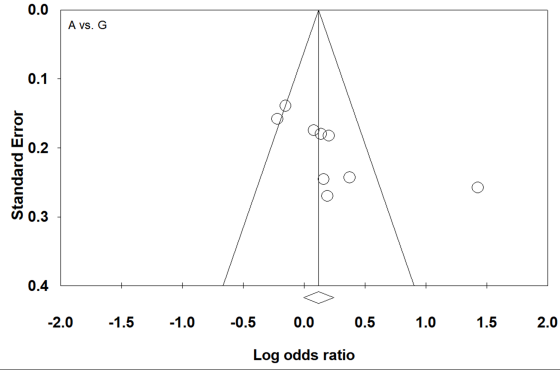

**Funnel Plot of Standard Error by Log odds ratio**

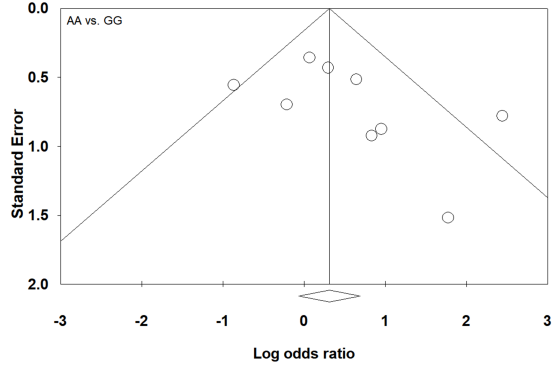

**Funnel Plot of Standard Error by Log odds ratio**

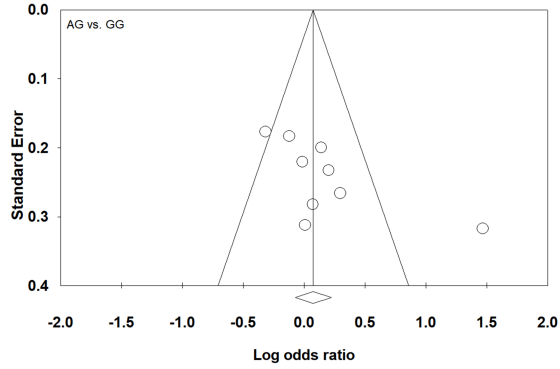

**Funnel Plot of Standard Error by Log odds ratio**

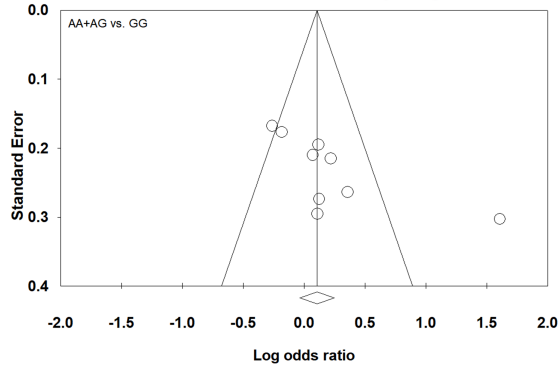

**Funnel Plot of Standard Error by Log odds ratio**

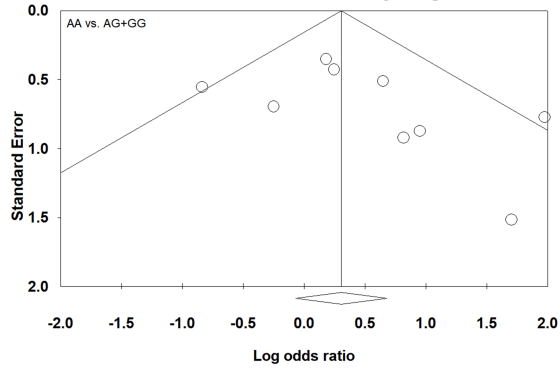

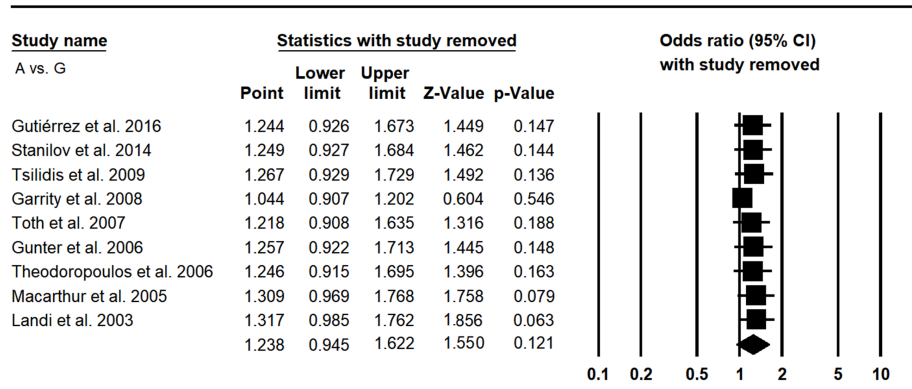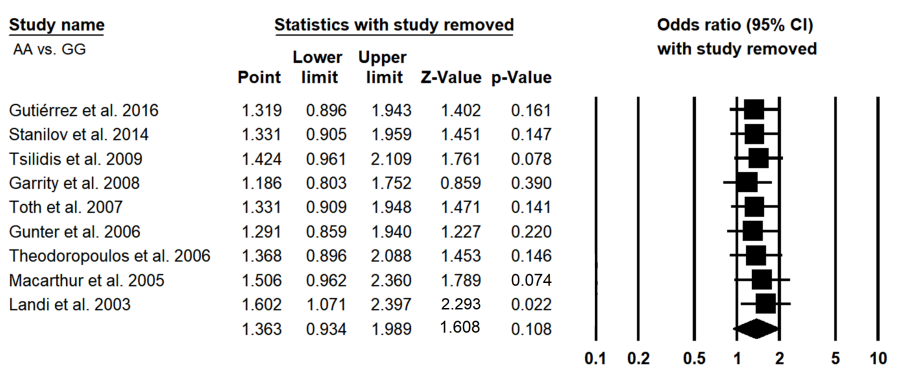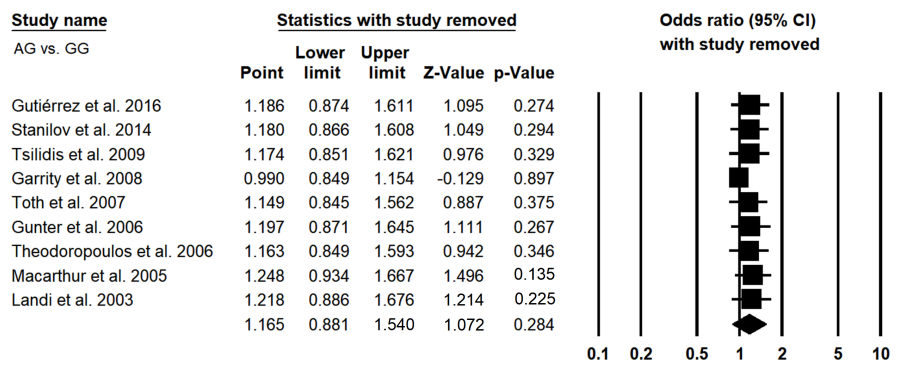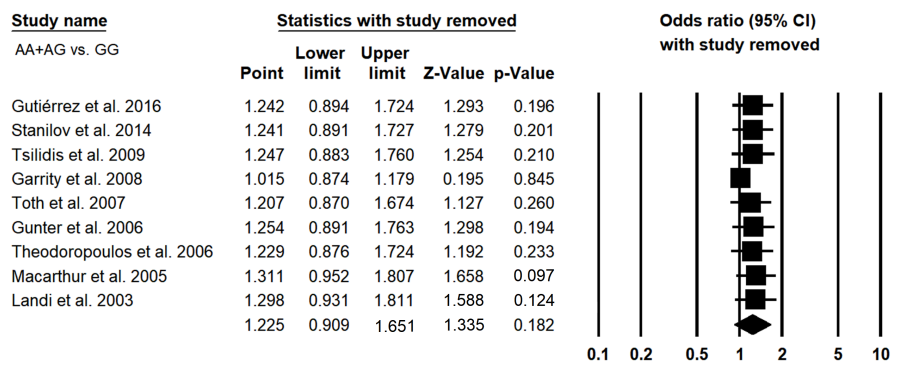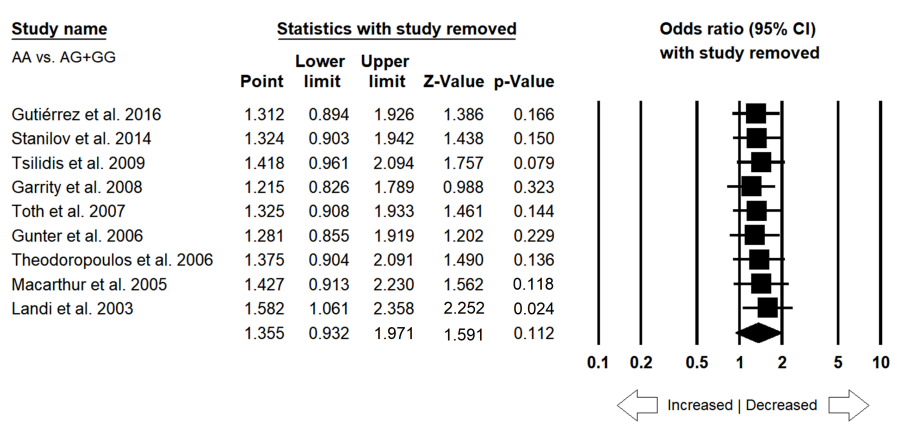

**Funnel Plot of Standard Error by Log odds ratio**

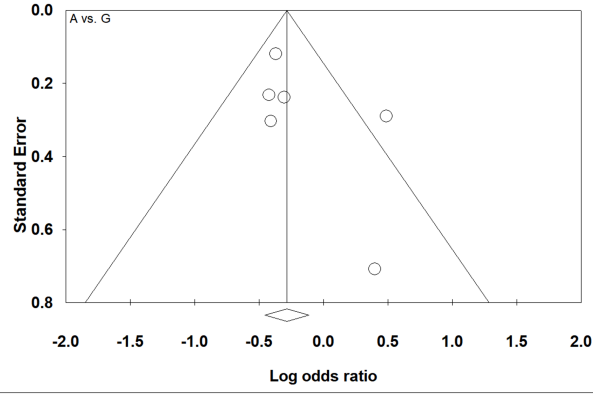

**Funnel Plot of Standard Error by Log odds ratio**

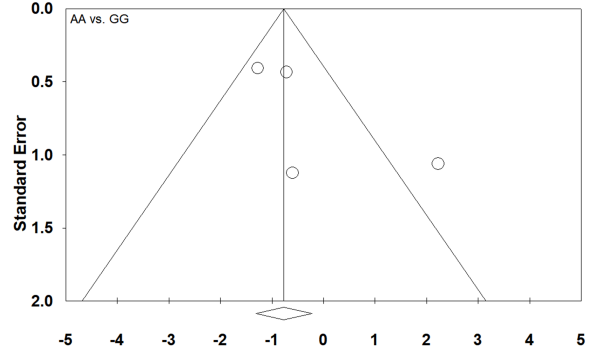

**Funnel Plot of Standard Error by Log odds ratio**

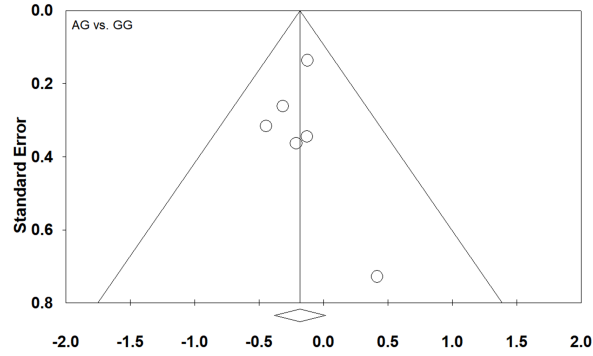

**Funnel Plot of Standard Error by Log odds ratio**

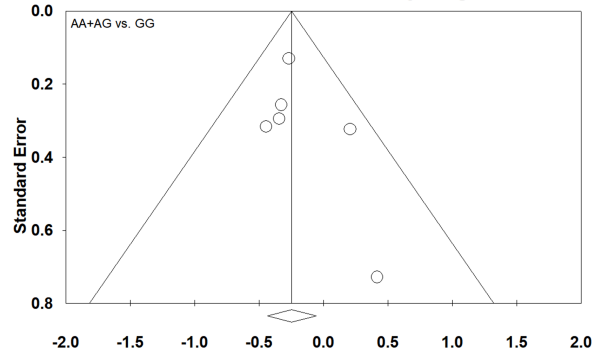

**Funnel Plot of Standard Error by Log odds ratio**

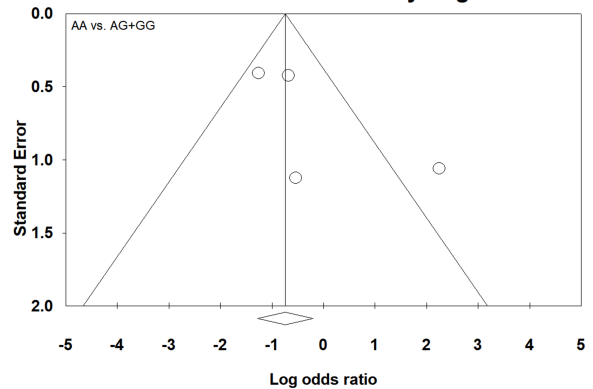

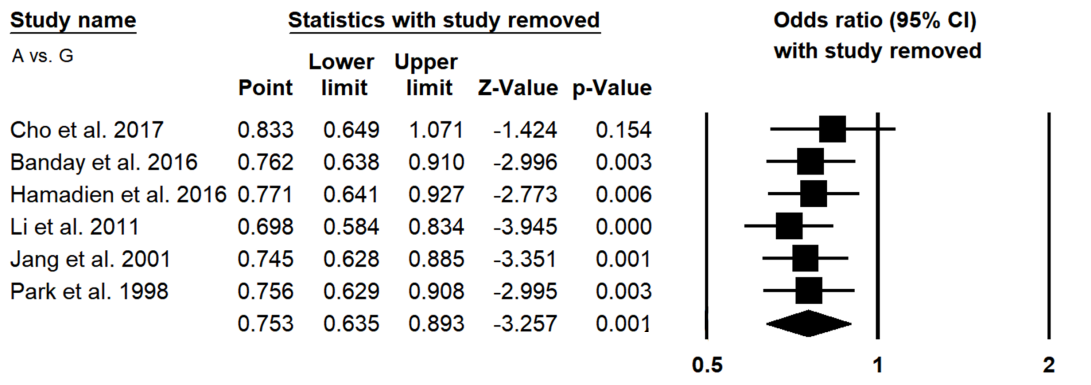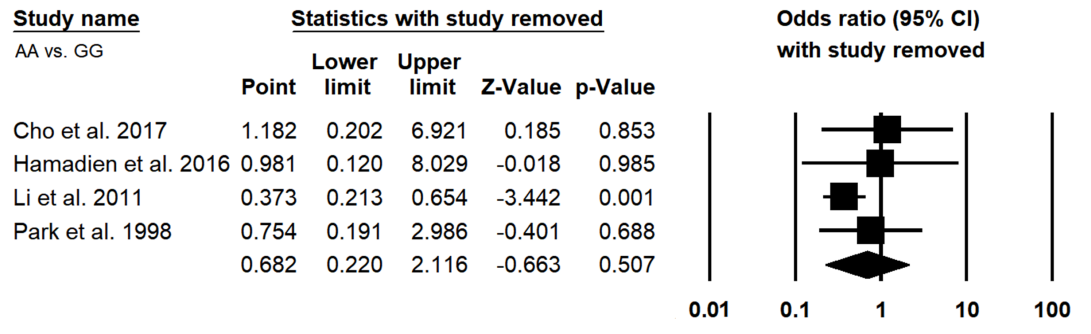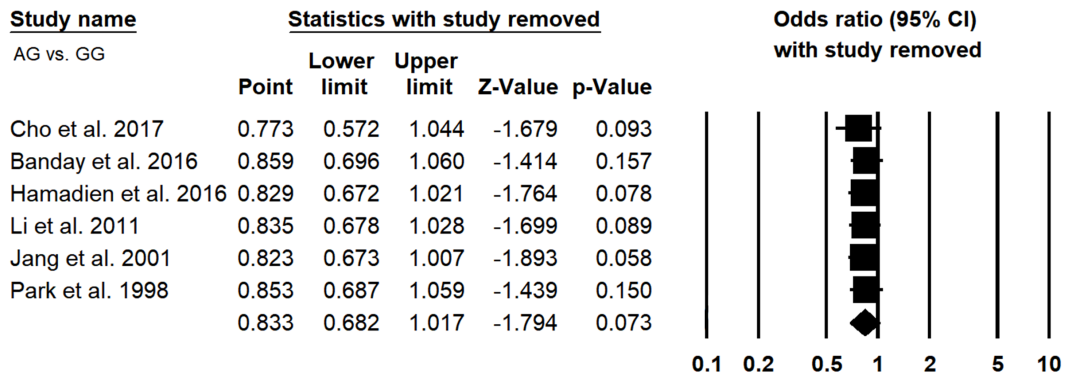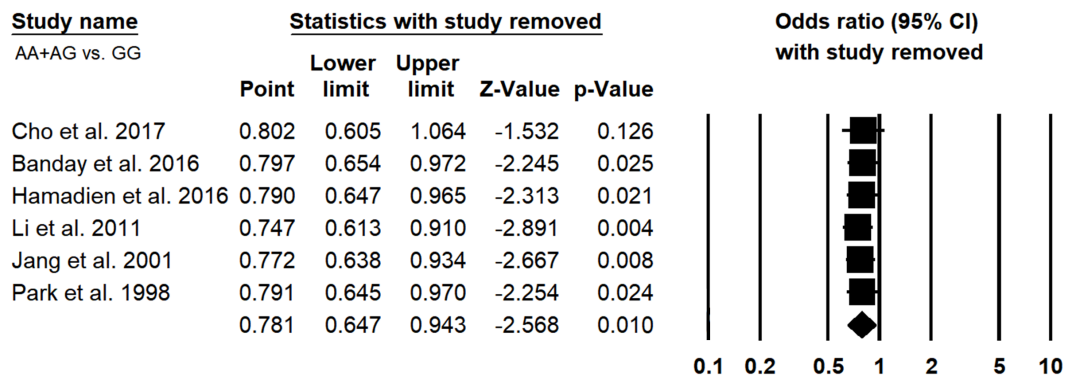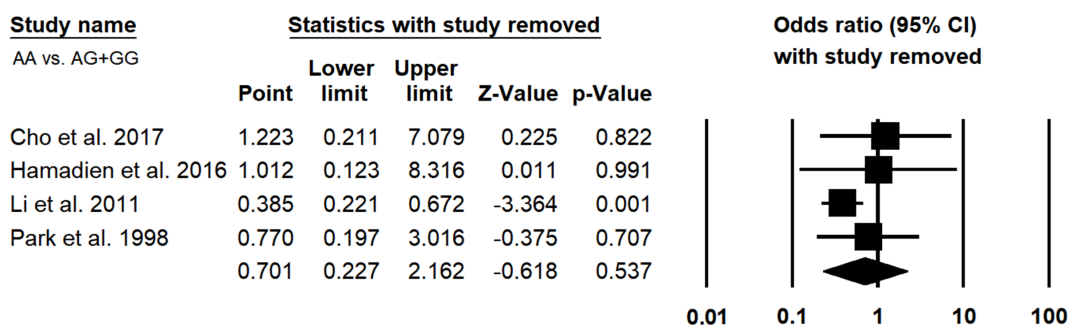

← Increased | Decreased →
